# Supplementary material
Source: publisher site journal article supplement (https://static.cambridge.org/content/id/urn:cambridge.org:id:article:S0047279420000379/resource/name/S0047279420000379supp001.doc)
Supplement: Supplementary file 1 [file S0047279420000379supp001.doc]

**Zagadnienia do rozmowy z ekspertami**

**A.**    **Stanowisko eksperta w relacji do polityki spo**ł**ecznej i migracji w UE**

- Proszę wyjaśnić, w skrócie, Pana/Pani rolę w kontekście polityki społecznej i migracji w UE

**B.**    **Spojrzenie/opinia eksperta na system opieki państwowej – ogólnie**

- Każdy system opiekuńczy państwa ma swoją własną historię, cele i role w narodowej społeczności. Jak opisałby Pan/Pani system opieki w Polsce i jego główne zalety i wady?

**C.**     **Pogląd eksperta na migrację w UE, nieograniczony przepływ ludzi w relacji do państwowego systemu opieki**

- Jaki główny problem, który istniej wokół migracji w UE, opisałby Pan/Pani w kontekście Polski w ostatnich latach?
- Może Pan/Pani wyjaśnić, bardziej szczegółowo, narodowe kontrowersje lub problemy które pojawiły się w ostatnich latach wokół zagadnienia migracji w UE?
- Jak Pan/Pani uważa skąd one pochodzą?
- Jak daleko posunięte są te problemy w polityce i programach politycznych w Polsce?
- Co może wpłynąć na fakt, czy program zostanie wykonany?
- W Pan/Pani opinii, jak bardzo jest to problem wspólny dla innych sytemow opieki panstwowej w UE ?

**D.**    **Pogląd eksperta na reformy państwowe , które mają wpływ na migrację i nieograniczony ruch ludności w UE**

- Czy są reformy ostatnio zaproponowane w Polsce które mogę mieć wpływ na to jak i kiedy obywatele UE/migranci mają dostęp do państwowego systemy pomocy?
- Jak Pan/Pani opisałaby cele tych reform?
- Co myśli Pan/Pani o tych reformach i co przez te reformy próbuje się osiągnąć?
- Czy są jakieś *inne* (istniejące) reformy, które Pan/Pani mogłaby zaproponować aby rozwiązać te specyficzne problemy albo szersze kontrowersje, które gromadzą się wokół zagadnienia wolnego przepływu ludności i polityki społecznej?

[Jeśli nie ma aktualnych reform, lub niebawem które mają się pojawić, pytanie to może być zamieniane  na:]

- Czy są jakieś reformy które mogłaby Pani/Pan zaproponować, które mogą sprostać tym problemom albo rozwiązać kontrowersje nieograniczonego przepływu ludności i polityki społecznej?

E.      **Spojrzenie eksperta na UE i państwowe instytucje albo autorytety, które mają znaczenie dla polityki nieograniczonego przepływu i pomocniczości państwa.**

- Które narodowe instytucje lub autorytety są kluczowe i mają realne znaczenie dla tworzenia politycznego programu wokół nieograniczonego przepływu i pomocniczości państwa?
- Jak wskazane instytucje liczą się faktycznie i jak opisałaby Pan/Pani ich rolę w relacji do Polski?
- Co powinna albo możne zrobić UE innego w relacji do UE wolnego przepływu ludności?
